# Supplementary material for: Adipocytokine levels in Chronic Periodontitis and Type 2 Diabetes Mellitus after Nonsurgical Periodontal Therapy
Source: Research Square preprint supplement (doi:10.21203/rs.3.rs-5149444/v1), 2024-10-22
Supplement: Supplementary file 1 [file 2ea948887db5137c3cbee389.docx]

| s. no.  Table 4: Joanna Briggs Risk of Bias Assessment | Author Journal and year | Were the groups comparable other than the presence of disease in cases or the absence of disease in controls? | Were cases and controls matched appropriately? | Were the same criteria used for identification of cases and controls? | Was exposure measured in a standard, valid and reliable way? | Was exposure measured in the same way for cases and controls? | Were confounding factors identified | Were strategies to deal with confounding factors stated | Were outcomes assessed in a standard, valid and reliable way for cases and controls | Was the exposure period of interest long enough to be meaningful | Was appropriate statistical analysis used |
| --- | --- | --- | --- | --- | --- | --- | --- | --- | --- | --- | --- |
|  | Ahuja CR,. J Investig Clin Dent. 2019 10 | Yes | Yes | Not clear | Yes | Yes | Yes | Yes | Yes | Yes | Yes |
|  | Doğan ŞB, etal J Periodontol. 2016 Aug;87(8):923-33.14 | Yes | Yes | Yes | Yes | Yes | Not clear | Yes | Yes | Yes | Yes |
|  | Joshi Aet al Indian J Dent Res. 2019 1 | Yes | Yes | Yes | Yes | Yes | Yes | Yes | Yes | Not clear | Yes |
|  | Mishra Vet al J Clin Diagn Res. 2016 11 | Yes | Yes | Not clear | Yes | Yes | Yes | Yes | Yes | Yes | Yes |
|  | Gd G, et al. Cureus. 2023 9 | Yes | Yes | Yes | Yes | Yes | Yes | Not clear | Yes | Yes | Yes |
|  | Wu Yet al J Periodontol. 2015 17 | Yes | Yes | Yes | Yes | Yes | Yes | Not clear | Yes | Yes | Yes |
|  | Rode PA et al. Journal of Indian Society of Periodontology. 201915 | Yes | Yes | Yes | Yes | Yes | Yes | Not clear | Yes | Yes | Yes |
