# Supplementary material for: Adipocytokine levels in Chronic Periodontitis and Type 2 Diabetes Mellitus after Nonsurgical Periodontal Therapy
Source: Research Square preprint supplement (doi:10.21203/rs.3.rs-5149444/v1), 2024-10-22
Supplement: Supplementary file 2 [file 61c32823255807254fae3c94.docx]

Table 1: Search strategy

| s.no. | Key words | Database | N= |
| --- | --- | --- | --- |
|  | ("gingival crevicular fluid"[MeSH Terms] OR ("gingival"[All Fields] AND "crevicular"[All Fields] AND "fluid"[All Fields]) OR "gingival crevicular fluid"[All Fields]) AND ("adipokines"[Supplementary Concept] OR "adipokines"[All Fields] OR "adipocytokine"[All Fields] OR "adipokines"[MeSH Terms] OR "adipocytokines"[All Fields]) AND ("chronic periodontitis"[MeSH Terms] OR ("chronic"[All Fields] AND "periodontitis"[All Fields]) OR "chronic periodontitis"[All Fields]) AND (("nonsurgical"[All Fields] OR "nonsurgically"[All Fields]) AND ("periodontal"[All Fields] OR "periodontally"[All Fields] OR "periodontically"[All Fields] OR "periodontics"[MeSH Terms] OR "periodontics"[All Fields] OR "periodontic"[All Fields] OR "periodontitis"[MeSH Terms] OR "periodontitis"[All Fields] OR "periodontitides"[All Fields]) AND ("therapeutics"[MeSH Terms] OR "therapeutics"[All Fields] OR "therapies"[All Fields] OR "therapy"[MeSH Subheading] OR "therapy"[All Fields] OR "therapy s"[All Fields] OR "therapys"[All Fields])) AND ("diabetes mellitus, type 2"[MeSH Terms] OR "type 2 diabetes mellitus"[All Fields]) | Pubmed | 07 |
|  | ("gingival crevicular fluid"[MeSH Terms] OR ("gingival"[All Fields] AND "crevicular"[All Fields] AND "fluid"[All Fields]) OR "gingival crevicular fluid"[All Fields]) AND ("adipokines"[Supplementary Concept] OR "adipokines"[All Fields] OR "adipocytokine"[All Fields] OR "adipokines"[MeSH Terms] OR "adipocytokines"[All Fields]) AND ("chronic periodontitis"[MeSH Terms] OR ("chronic"[All Fields] AND "periodontitis"[All Fields]) OR "chronic periodontitis"[All Fields]) AND (("nonsurgical"[All Fields] OR "nonsurgically"[All Fields]) AND ("periodontal"[All Fields] OR "periodontally"[All Fields] OR "periodontically"[All Fields] OR "periodontics"[MeSH Terms] OR "periodontics"[All Fields] OR "periodontic"[All Fields] OR "periodontitis"[MeSH Terms] OR "periodontitis"[All Fields] OR "periodontitides"[All Fields]) AND ("therapeutics"[MeSH Terms] OR "therapeutics"[All Fields] OR "therapies"[All Fields] OR "therapy"[MeSH Subheading] OR "therapy"[All Fields] OR "therapy s"[All Fields] OR "therapys"[All Fields])) AND ("diabetes mellitus, type 2"[MeSH Terms] OR "type 2 diabetes mellitus"[All Fields]) | Scopus | 05 |
|  | ("gingival crevicular fluid"[MeSH Terms] OR ("gingival"[All Fields] AND "crevicular"[All Fields] AND "fluid"[All Fields]) OR "gingival crevicular fluid"[All Fields]) AND ("adipokines"[Supplementary Concept] OR "adipokines"[All Fields] OR "adipocytokine"[All Fields] OR "adipokines"[MeSH Terms] OR "adipocytokines"[All Fields]) AND ("chronic periodontitis"[MeSH Terms] OR ("chronic"[All Fields] AND "periodontitis"[All Fields]) OR "chronic periodontitis"[All Fields]) AND (("nonsurgical"[All Fields] OR "nonsurgically"[All Fields]) AND ("periodontal"[All Fields] OR "periodontally"[All Fields] OR "periodontically"[All Fields] OR "periodontics"[MeSH Terms] OR "periodontics"[All Fields] OR "periodontic"[All Fields] OR "periodontitis"[MeSH Terms] OR "periodontitis"[All Fields] OR "periodontitides"[All Fields]) AND ("therapeutics"[MeSH Terms] OR "therapeutics"[All Fields] OR "therapies"[All Fields] OR "therapy"[MeSH Subheading] OR "therapy"[All Fields] OR "therapy s"[All Fields] OR "therapys"[All Fields])) AND ("diabetes mellitus, type 2"[MeSH Terms] OR "type 2 diabetes mellitus"[All Fields]) | Ebsco | 07 |
|  | ("gingival crevicular fluid"[MeSH Terms] OR ("gingival"[All Fields] AND "crevicular"[All Fields] AND "fluid"[All Fields]) OR "gingival crevicular fluid"[All Fields]) AND ("adipokines"[Supplementary Concept] OR "adipokines"[All Fields] OR "adipocytokine"[All Fields] OR "adipokines"[MeSH Terms] OR "adipocytokines"[All Fields]) AND ("chronic periodontitis"[MeSH Terms] OR ("chronic"[All Fields] AND "periodontitis"[All Fields]) OR "chronic periodontitis"[All Fields]) AND (("nonsurgical"[All Fields] OR "nonsurgically"[All Fields]) AND ("periodontal"[All Fields] OR "periodontally"[All Fields] OR "periodontically"[All Fields] OR "periodontics"[MeSH Terms] OR "periodontics"[All Fields] OR "periodontic"[All Fields] OR "periodontitis"[MeSH Terms] OR "periodontitis"[All Fields] OR "periodontitides"[All Fields]) AND ("therapeutics"[MeSH Terms] OR "therapeutics"[All Fields] OR "therapies"[All Fields] OR "therapy"[MeSH Subheading] OR "therapy"[All Fields] OR "therapy s"[All Fields] OR "therapys"[All Fields])) AND ("diabetes mellitus, type 2"[MeSH Terms] OR "type 2 diabetes mellitus"[All Fields]) | Open Gray literature | 0 |
