# Supplementary material for: Adipocytokine levels in Chronic Periodontitis and Type 2 Diabetes Mellitus after Nonsurgical Periodontal Therapy
Source: Research Square preprint supplement (doi:10.21203/rs.3.rs-5149444/v1), 2024-10-22
Supplement: Supplementary file 4 [file 987c8717f9203f1ea83207b6.docx]

Table 3: Clinical parameters of periodontitis

| **Name of the journal , author and year** | **Adipocytokine evaluated** | **Oral disease** | **Systemic condition** | **Number of groups** | **Control group** | **Clinical Attachment (CAL)level before treatment** | **Clinical Attachment level (CAL) after treatment** | **Gingival Index(GI) before treatment** | **Gingival Index( GI) after treatment** | **Plaque Index before treatment** | **Plaque index after treatment** | **Periodontal Probing depth before treatment** | **Periodontal probing depth after treatment** | **Inference** |
| --- | --- | --- | --- | --- | --- | --- | --- | --- | --- | --- | --- | --- | --- | --- |
| Ahuja CR,. J Investig Clin Dent. 20191 | Leptin | chronic periodontitis | type 2 diabetes mellitus (T2DM) | 90 patients divided into 3 groups (n=30) Group 1 : Systemically healthy with no oral disease , Group 2: Chronic periodontitis with out Type 2 diabetes Group 3 : CP+T2DM | yes | 6.01 ±0.38 | 4.77 ± 0.64 | 2.05 ± 0.40 | 1.15 ± 0.40 | 2.45±0.33 | 0.64±0.20 | 5.60±0.38 | 4.20±0.51 | NSPT improves the clinical paramters significantly |
| Doğan ŞB, et al J Periodontol. 201614 | Chemerin | chronic periodontitis | type 2 diabetes mellitus | 80 patients divided into 4 groups (n=20) Group1 : healthy controls Group2 : patients with T2DM and periodontally healthy Group 3: Patients with systematically healthy and CP Type 2 DM Group 4 : Patients with CP and Type 2 DM | yes | 4.31 ± 0.36 | 3.09± 0.43 | 2.29±0.40 | 0.76±0.34 | 2.55±0.33 | 0.54±0.31 | 4.11±0.34 | 2.67±0.26 | NSPT improves the clinical paramters significantly |
| Gd G, et al. Cureus. 2023 9 | Chemerin | chronic periodontitis | type 2 diabetes mellitus | 60 Patients divided into 4 groups : Group 1: Systemically and periodontally healthy subjects, Group 2: Systemically healthy subjects with generalized periodontitis Group 3 : CP + T2DM Group 4 : Periodontally healthy withT2DM | yes | 5.60±0.50 | 3.03±0.19 | 2.9±0.28 | 1.48±0.13 | 2.69±0.40 | 1.86±0.12 | 5.6±0.52 | 2.97±0.20 | NSPT improves the clinical paramters significantly |
| Wu Yet al J Periodontol. 201517 | Visfatin | chronic periodontitis | Type 2 diabetes mellitus | 46 patients divided into 2 groups: Control group and Type 2 DM patients | yes | 3.66 ± 1.29 | 3.18 ± 1.26 | 2.68±0.71 | 1.95±0.62 | - | - | 3.73±0.58 | 3.01±0.63 | NSPT improves the clinical paramters significantly |
| Rode PA et al. Journal of Indian Society of Periodontology. 201915 | Resistin | chronic periodontitis | Type 2 diabetes mellitus | 60 patients divided into 3 study groups: Group 1- periodontally healthy, Group 2- CP, Group 3- CP with T2DM | yes | 7.14 + 1.59 | 4.51 + 1.38 | 1.86±0.39 | 0.28±0.27 | 1.43±0.20 | 0.21±0.17 | 6.28±1.52 | 4.01±1.38 | NSPT improves the clinical paramters significantly |

NSPT: nonsurgical periodontal therapy

T2DM: Type 2 Diabetes Mellitus

CP : Chronic Periodontitis
