# Supplementary material for: Adipocytokine levels in Chronic Periodontitis and Type 2 Diabetes Mellitus after Nonsurgical Periodontal Therapy
Source: Research Square preprint supplement (doi:10.21203/rs.3.rs-5149444/v1), 2024-10-22
Supplement: Supplementary file 5 [file 9c09219fdd08e6bd525ba497.docx]

Table 2: Characteristics of the studies included

| **Name of the journal , author and year** | **Adipocytokine evaluated** | **Oral disease** | **Systemic condition** | **Number of groups** | **Control group** | **Method of GCF collection** | **Method of evaluation of biomarker** | **GCF level at baseline for healthy group in ng/ml** | **GCF level post treatment** | **GCF at baseline for CP+ T2DM** | **GCF post treatment for CP+ T2DM** | **P values** | **Inference** |
| --- | --- | --- | --- | --- | --- | --- | --- | --- | --- | --- | --- | --- | --- |
| Ahuja CR,. J Investig Clin Dent. 2019 | Leptin | chronic periodontitis | type 2 diabetes mellitus (T2DM) | 90 patients divided into 3 groups (n=30) Group 1 : Systemically healthy with no oral disease , Group 2: Chronic periodontitis with out Type 2 diabetes Group 3 : CP+T2DM | yes | microcapillary method | ELISA | 7.28 ± 0.55 | 7.98 ± 0.59 | 3.97 ± 0.70 | 5.00 ± 0.78 | p<0.00001 | The adipocytokine levels increased after NSPT |
| Doğan ŞB, etal J Periodontol. 2016 Aug;87(8):923-33. | Chemerin | chronic periodontitis | type 2 diabetes mellitus | 80 patients divided into 4 groups (n=20) Group1 : healthy controls Group2 : patients with T2DM and periodontally healthy Group 3: Patients with systematically healthy and CP Type 2 DM Group 4 : Patients with CP and Type 2 DM | yes | paper strip method | ELISA | 0.27±0.03 | 0 | 0.50±0.03 | 0.33±0.03 | p<0.008 | The adipocytokine levels decreased significantly after NSPT |
| Joshi A et al Indian J Dent Res. 2019 1 | Resistin | chronic periodontitis | type 2 diabetes mellitus | 40 patients divided into 2 groups of 20 each 2  Group 1 : Systemically healthy with gingivitis , Group 2: Chronic periodontitis with Type 2 diabetes | yes | microcapillary method | ELISA | 1.96 + 0.67 | 1.36 + 0.62 | 2.50 + 0.25 | 1.93 + 0.22 | p<0.001 | The adipocytokine levels decreased significantly after NSPT |
| Mishra Vet al J Clin Diagn Res. 2016 11 | Visfatin | chronic periodontitis | type 2 diabetes mellitus | 42 subjects divided into Gr 1 ( healthy ) , Gr 2 (Systemically healthy + T2DM) , Gr3 ( CP + T2DM) | yes | microcapillary method | ELISA | 9.29 + 3.68 | 9.26 + 3.66 | 88.81 + 6.39 | 29.43 + 4.32 | p <0.00001 | The adipocytokine levels decreased significantly after NSPT |
| Gd G, et al. Cureus. 2023 9 | Chemerin | chronic periodontitis | type 2 diabetes mellitus | 60 Patients divided into 4 groups : Group 1: Systemically and periodontally healthy subjects, Group 2: Systemically healthy subjects with generalized | yes | microcapillary method | ELISA | 89.2 + 1.90 | 0 | 199.11 + 5.2 | 125.58 + 6.05 | p <0.01 | The adipocytokine levels decreased significantly after NSPT |
| Wu Yet al J Periodontol. 201517 | Visfatin | chronic periodontitis | type 2 diabetes mellitus | 46 patients divided into 2 groups: Control group and Type 2 DM patients | yes | microcapillary method | ELISA | 83.59 + 37.02 | 74.97 + 37.92 | 80.65 + 36.17 | 26.55 + 18.67 | p < 0.05 | The adipocytokine levels decreased significantly after NSPT |
| Rode PA et al. Journal of Indian Society of Periodontology. 201915 | Resistin | Chronic periodontitis | type 2 diabetes mellitus | 60 patients divided into 3 study groups: Group 1- periodontally healthy, Group 2- CP, Group 3- CP with T2DM | Yes | Microcappilary method | ELISA | 0.15± 0.15 | 0.003±0.004 | 2.43± 0.62 | 0.22± 0.15 | P< 0.0001 | The adipocytokine levels decreased significantly after NSPT |

T2DM: Type 2 Diabetes mellitus

NSPT: Non surgical periodontal therapy

GCF : Gingival Crevicular Fluid

CP: Chronic Periodontitis

P: significance level
